# Supplementary material for: Modeling Normal and Pathological Ear Cartilage in vitro Using Somatic Stem Cells in Three-Dimensional Culture
Source: PubMed Central journal article supplement (PMC7402373; doi:10.3389/fcell.2020.00666), 2020-07-28
Supplement: Data_Sheet_1.pdf [file Data_Sheet_1.pdf]

## Full Scan of agarose gels of PCR products shown in Supplementary Materials

### 1 Reverse Transcription-PCR gel blots

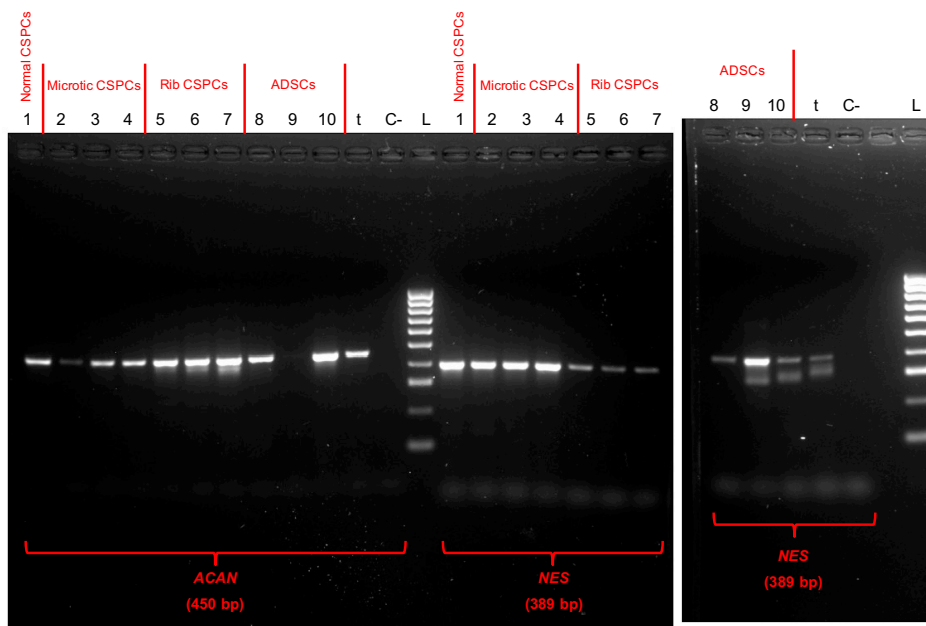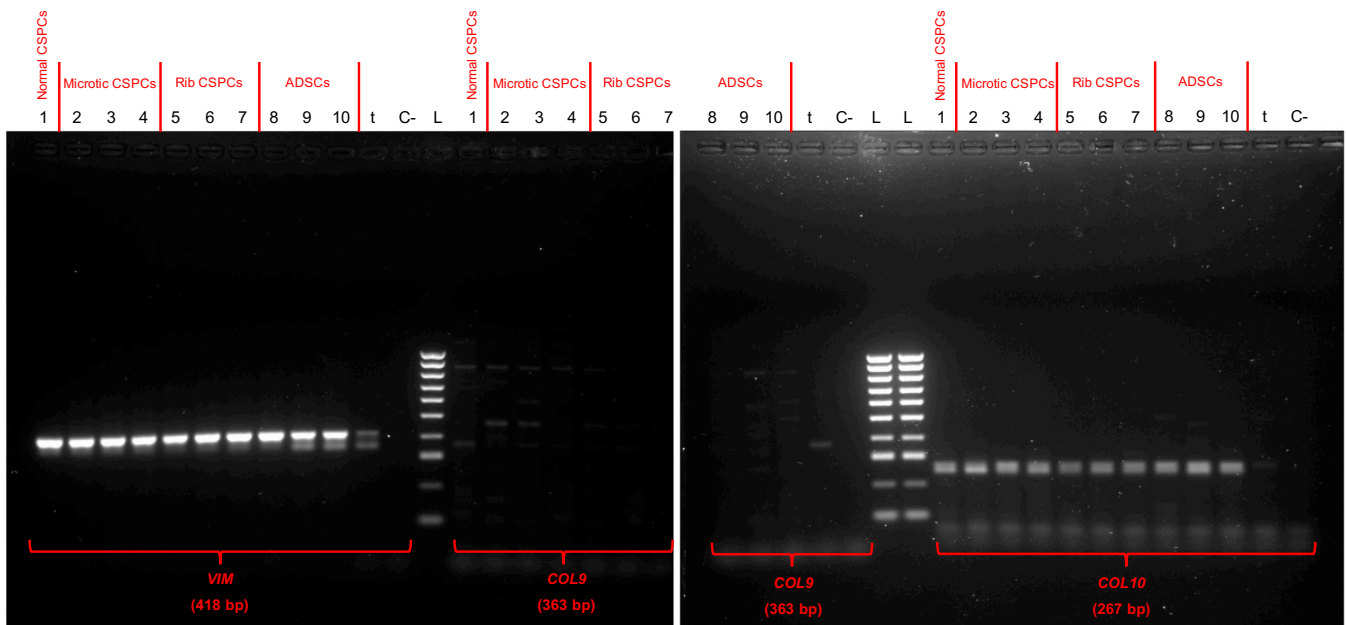

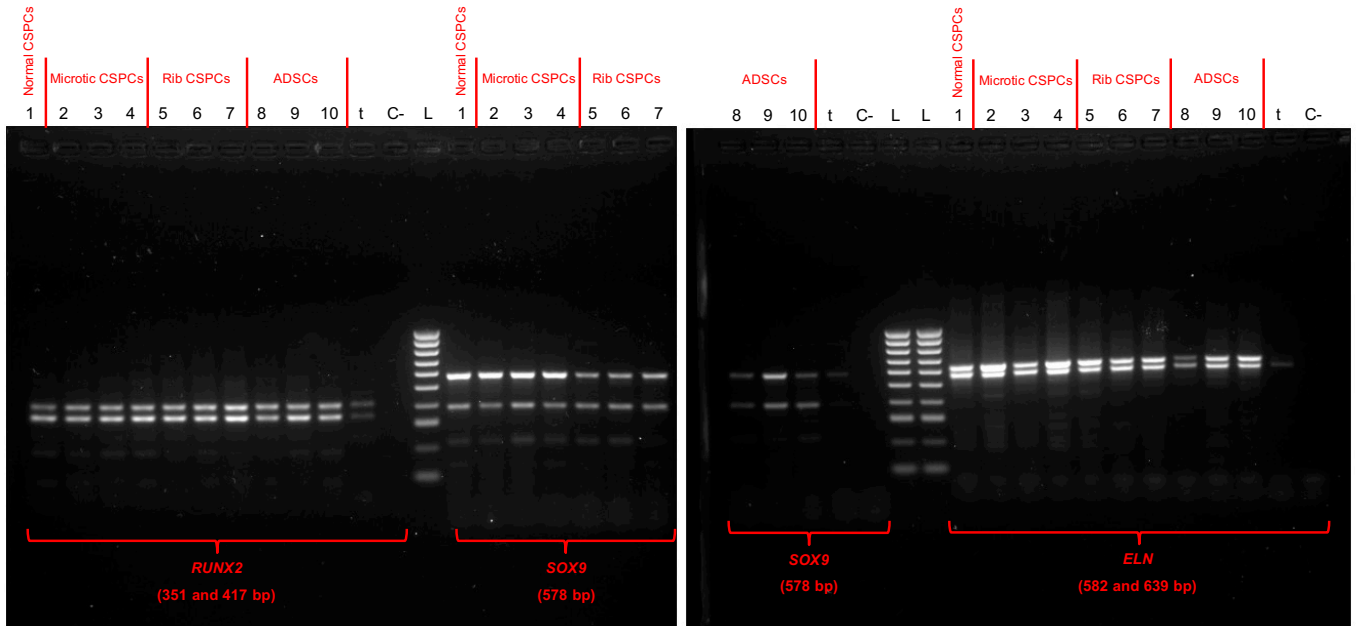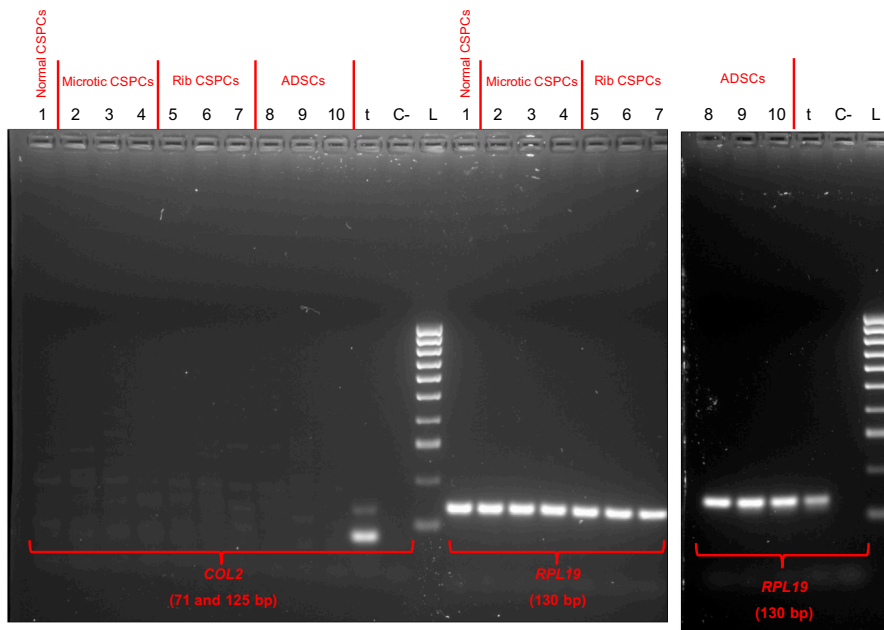

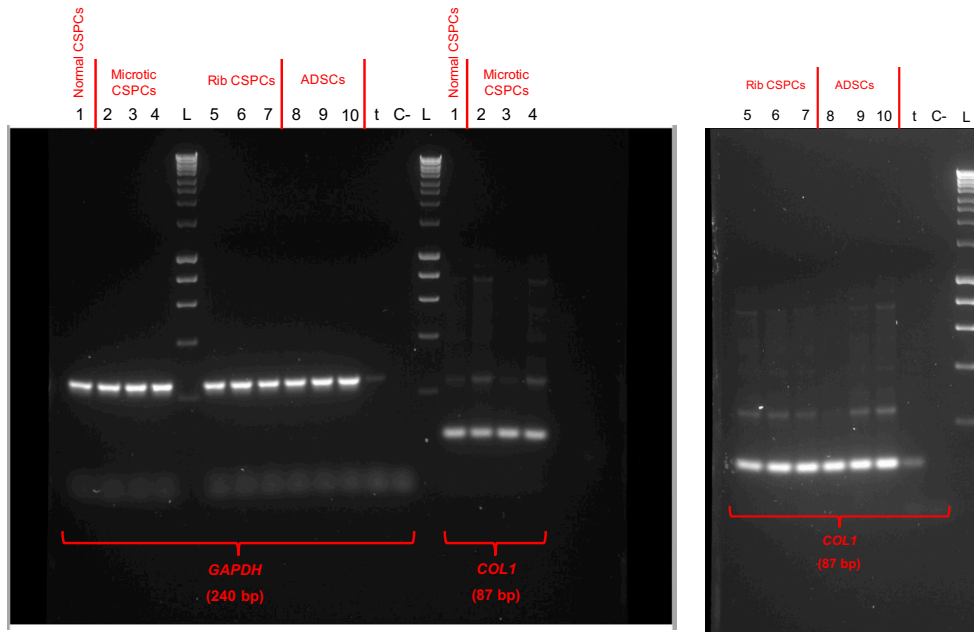

**Supplementary Material 2. Full scan of entire original PCR gels shown in Supplementary Fig. 4.** (1) one normal CSPCs, (2-4) three microtic CSPCs, (5-7) three rib-CSPCs, and (8-10) three ADSCs. Aggrecan (*ACAN*), Nestin (*NES*), Vimentin (*VIM*), Collagen 9 (*COL9*), Collagen 10 (*COL10*), Runt-related transcription factor 2 (*RUNX*), SRY-Box (*SOX9*), Elastin (*ELN*), Collagen 2 (*COL2*), Ribosomal Protein L19 (*RPL19*), GAPDH (*GAPDH*) and Collagen 1 (*COL1*) genes. Microtic ear cartilage (t) was used as positive control and in the negative control (C-) cDNA was replaced with water. Hyperladder 100 bp was used in all gels, except in *GAPDH* and *COL1* gels (Hyperladder 1 Kb).
